# Supplementary material
Source: Springer Nature journal article supplement (https://www.springermedizin.de/resource/supplementary/12967_2009_408_MOESM1_ESM.pdf/9576406)

# Stroke

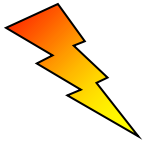

Focal cerebral hypoperfusion

Excitotoxicity

Oxidative stress

Microvascular injury

Post-ischemic inflammation

Blood-brain barrier dysfunction

**Cell Death**

**Cerebral damage**

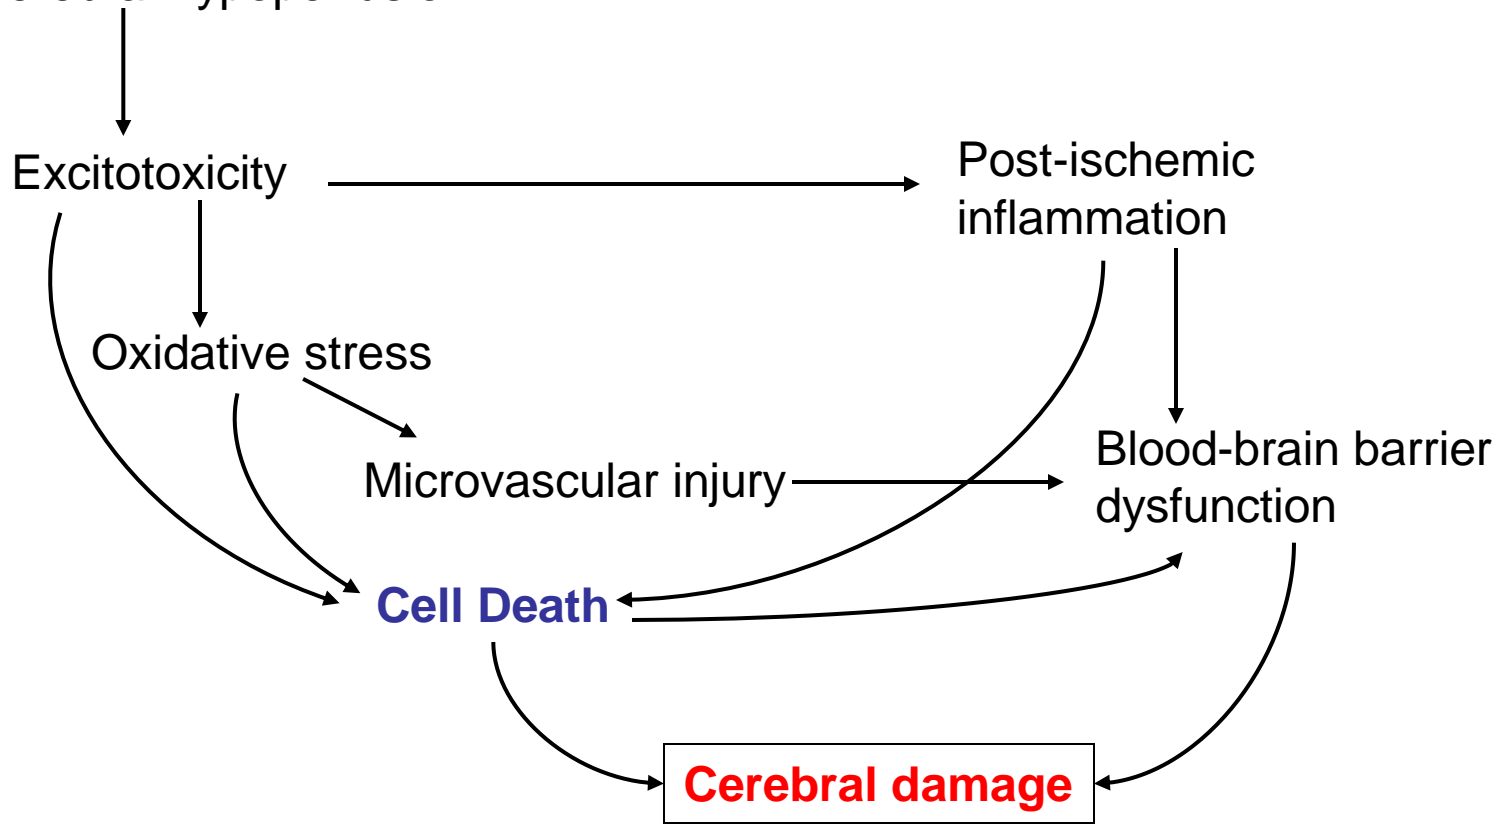

Supplement: MOESM1 [file 9576406]
